# Supplementary material for: OMI-measured increasing SO 2 emissions due to energy industry expansion and relocation in northwestern China
Source: Copernicus journal article supplement (doi:10.5194/acp-17-9115-2017), 2017-07-27
Supplement: Supplementary file 1 [file acp-17-9115-2017-supplement.zip]

*Supplement of*

**OMI measured increasing SO<sub>2</sub> emissions due to energy industry  
expansion and relocation in Northwestern China**

**Authors:**

Zaili Ling<sup>1</sup>, Tao Huang<sup>1,\*</sup>, Yuan Zhao<sup>1</sup>, Jixiang Li<sup>1</sup>, Xiaodong Zhang<sup>1</sup>, Jinxiang Wang<sup>1</sup>,  
Lulu Lian<sup>1</sup>, Xiaoxuan Mao<sup>1</sup>, Hong Gao<sup>1</sup>, Jianmin Ma<sup>2,1,3,\*</sup>

**Affiliation:**

<sup>1</sup>Key Laboratory for Environmental Pollution Prediction and Control, Gansu Province  
College of Earth and Environmental Sciences, Lanzhou University, Lanzhou 730000,  
P. R. China

<sup>2</sup> Laboratory for Earth Surface Processes, College of Urban and Environmental  
Sciences, Peking University, Beijing, 100871, China

<sup>3</sup>CAS Center for Excellence in Tibetan Plateau Earth Sciences, Chinese Academy of  
Sciences, Beijing, 100101, China

**Corresponding authors:** Jianmin Ma, Tao Huang

College of Earth and Environmental Sciences, Lanzhou University, 222, Tianshui  
South Road, Lanzhou 730000, China

Email: [jianminma@lzu.edu.cn](mailto:jianminma@lzu.edu.cn); [huangt@lzu.edu.cn](mailto:huangt@lzu.edu.cn)

## Uncertainty analysis for SO<sub>2</sub> emission derived by OMI measurements

**Table S1.** Coefficients of variation (*CV*, %) of input parameters for the uncertainty analysis (McLinden et al., 2014, 2016; Fioletto et al; 2016) in estimations of SO<sub>2</sub> emission derived from OMI measurements.

| Parameter     | Air mass factor (AMF) | Mass | $\Sigma$ | $\tau$ |
|---------------|-----------------------|------|----------|--------|
| <i>CV</i> (%) | 18                    | 5    | 35       | 35     |

Mass: total SO<sub>2</sub> mass as determined from a linear regression.

$\sigma$ : standard deviation of the width or spread of SO<sub>2</sub>.

$\tau$ : decay time of SO<sub>2</sub>.

## Comparisons between measured ambient concentration data and SO<sub>2</sub> VCD

The OMI retrieved SO<sub>2</sub> PBL VCD were further evaluated by comparing with ambient air concentration data of SO<sub>2</sub> from routine measurements by local official air quality monitoring stations (<http://www.aqistudy.cn/historydata/>). These measured data include daily averaged air concentrations of SO<sub>2</sub> from 2014 to 2015, covering 188 major cities in China. We compared monthly averaged SO<sub>2</sub> VCD over all grid points (0.25×0.25 latitude/longitude resolution) with the monthly averaged monitored concentrations of SO<sub>2</sub> in 188 cities. Result is shown in **Figure S1**. The OMI retrieved SO<sub>2</sub> VCD match well with the measured SO<sub>2</sub> concentrations at a correlation coefficient of  $r=0.85$  ( $p<0.001$ ).

**Table S2** Statistics between satellite derived SO<sub>2</sub> VCD and monitored SO<sub>2</sub> annually averaged air concentrations during 2014-2015 at 188 operational air quality monitoring stations across China. In the table,  $r$  is the correlation coefficient, RE is the relative error, FB is the fractional bias, NMB is the normalized mean bias, and RMSE is the root mean square error, respectively.

| $r$               | RE   | FB     | NMB   | RMSE |
|-------------------|------|--------|-------|------|
| 0.85 ( $p<0.05$ ) | 0.25 | 0.0003 | 0.119 | 9.65 |

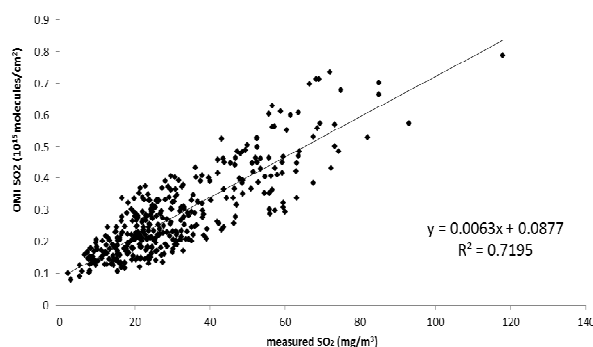

**Figure S1** Comparisons between monthly averaged concentration of SO<sub>2</sub> and OMI retrieved SO<sub>2</sub> VCD from 2014 to 2015.  $n$  is the number of data points used in correlation analysis,  $r$  is the correlation coefficient, and  $p$  is the significance level.

## Reference

- McLinden, C. A., Fioletov, V., Boersma, K. F., Kharol, S. K., Krotkov, N., Lamsal, L., Makar, P. A., Martin, R. V., Veefkind, J. P., and Yang, K.: Improved satellite retrievals of NO<sub>2</sub> and SO<sub>2</sub> over the Canadian oil sands and comparisons with surface measurements, *Atmos. Chem. Phys.*, 14, 3637–3656, doi:10.5194/acp-14-3637-2014, 2014.
- McLinden, C. A., Fioletov, V., Shephard, M. W., Krotkov, N., Li, C., Martin, R. V., Moran, M. D., and Joiner, J.: Space-based detection of missing sulfur dioxide sources of global air pollution, *Nature Geosci.*, 9, 496-500, doi: 10.1038/ngeo2724, 2016.
- Fioletov, V. E., McLinden, C. A., Krotkov, N., Li, C., Joiner, J., Theys, N., Carn, S., and Moran, M. D.: A global catalogue of large SO<sub>2</sub> sources and emissions derived from the Ozone Monitoring Instrument, *Atmos. Chem. Phys.*, 16, 11497–11519, doi: 10.5194/acp-16-11497-2016, 2016.
