# Supplementary material for: OMI-measured increasing SO 2 emissions due to energy industry expansion and relocation in northwestern China
Source: Copernicus journal article supplement (doi:10.5194/acp-17-9115-2017), 2017-07-27
Supplement: Supplementary file 2 [file acp-17-9115-2017-supplement.zip]

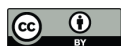

*Supplement of*

**OMI-measured increasing SO<sub>2</sub> emissions due to energy industry expansion and relocation in northwestern China**

**Zaili Ling et al.**

*Correspondence to:* Jianmin Ma ([jianminma@lzu.edu.cn](mailto:jianminma@lzu.edu.cn)) and Tao Huang ([huangt@lzu.edu.cn](mailto:huangt@lzu.edu.cn))

- [acp-17-9115-2017-supplement-title-page.pdf](#)
- [acp-2017-161-Data list.docx](#)
- [acp-2017-161-supplement-version4.pdf](#)

The copyright of individual parts of the supplement might differ from the CC BY 3.0 License.
