# Supplementary material for: OMI-measured increasing SO 2 emissions due to energy industry expansion and relocation in northwestern China
Source: Copernicus journal article supplement (doi:10.5194/acp-17-9115-2017), 2017-07-27
Supplement: Supplementary file 3 [file acp-17-9115-2017-supplement.zip]

Archive with 3 entries (3 files):
- acp-17-9115-2017-supplement-title-page.pdf
- acp-2017-161-Data list.docx
- acp-2017-161-supplement-version4.pdf
