# Supplementary material for: OMI-measured increasing SO 2 emissions due to energy industry expansion and relocation in northwestern China
Source: Copernicus journal article supplement (doi:10.5194/acp-17-9115-2017), 2017-07-27
Supplement: Supplementary file 3 [file acp-17-9115-2017-supplement.zip › acp-2017-161-Data list.docx]

**OMI-measured increasing SO2 emissions due to energy industry expansion and relocation in northwestern China**

*Ling et al.*

Data reference list

| Name of the data | Authors/Issuing organization | Title of the data set | Last access date | Database link address |
| --- | --- | --- | --- | --- |
| Satellite data | Goddard  Earth Sciences Data and Information Services Center | OMSO2e.003 | 2017.7.27 | https://mirador.gsfc.nasa.gov/cgi-bin/mirador/presentNavigation.pl?tree=project&project=OMI&dataGroup=L3_V003 |
| Ground SO2 monitoring data | National Environmental Monitoring Center(Ministry of Environmental  Protection of China) | Air quality historical data | 2017.7.27 | http://www.aqistudy.cn/historydata |
| Annually averaged SO2 concentrations | Provincial environmental bulletin (Ministry of Environmental  Protection of China) | Provincial air quality data | 2017.7.27 | http://www.zhb.gov.cn/hjzl/zghjzkgb/gshjzkgb/ |
| SO2 anthropogenic emission inventory | Tsinghua university | Multiresolution  Emission Inventory for China (MEIC) | 2017.7..27 | http://www.meicmodel.org/ |
